# Supplementary material for: A novel ratiometric electrochemical biosensing strategy based on T7 exonuclease-assisted homogenous target recycling coupling hairpin assembly-triggered double-signal output for the multiple amplified detection of miRNA
Source: Royal Society of Chemistry journal article supplement (doi:10.1039/d1an00204j), 2021-01-01
Supplement: d1an00204j1.pdf [file d1an00204j1.pdf]

## Supporting Information

### **A novel ratiometric electrochemical biosensing strategy based on T7 exonuclease assisted homogenous target recycling coupling hairpin assembly triggered double-signal output for multiple amplified detection of miRNA**

Qing-Yun Zhou<sup>a,†</sup>, Rong-Na Ma<sup>a,†,\*</sup>, Chao-Long Hu<sup>a</sup>, Fei Sun<sup>b</sup>, Li-Ping Jia<sup>a</sup>, Wei Zhang<sup>a</sup>, Lei Shang<sup>a</sup>, Qing-Wang Xue<sup>a</sup>, Wen-Li Jia<sup>a</sup>, Huai-Sheng Wang<sup>a,\*</sup>

*<sup>a</sup>School of Chemistry and Chemical Engineering, Liaocheng University, Liaocheng 252000, Shandong, P.R. China*

*<sup>b</sup>Oncology Department, Hospital of Traditional Chinese Medicine of Jinan City, Jinan, 250000, Shandong, P.R. China*

\*Corresponding author. Tel./Fax: +8686-635-8239121.

E-mail address: marongna@lcu.edu.cn (R. N. Ma), hswang@lcu.edu.cn (H. S. Wang)

## **Reagents and apparatus**

Tris (2-carboxyethyl) phosphine hydrochloride (TCEP), diethylpyrocarbonate (DEPC), tris (hydroxymethyl) aminomethane (Tris), ethylenediaminetetraacetic acid (EDTA) and 6-Mercapto-1-hexanol (MCH) were purchased from Sigma-Aldrich (USA). T7 Exo was obtained from New England Biolabs, Inc. (Beijing, China). All these reagents were used as received without further purification. All oligonucleotides were synthesized, HPLC-purified and freeze-dried by Sangon Biotechnology Co., Ltd. (Shanghai, China), and their sequences are listed in Table S1 (Supporting Information). Human serum samples were provided by Hospital of Traditional Chinese Medicine of Liaocheng City. Water used in this work was prepared using a Milli Q water purification system (18 M $\Omega$  cm resistivity) before being treated with DEPC (0.1%). The electrochemical measurements were carried out on a CHI 760C electrochemical workstation (CH Instruments Inc., U.S.A.). The images of gel electrophoresis were scanned by the Gel Image Analysis System (Bio-Rad, USA).

## **Pretreatment of electrode**

Before use, each bare gold electrode (~2 mm diameter, CH Instrument Inc.) was carefully polished to a mirror-like surface with 0.3  $\mu$ m alumina slurry and then successively ultrasonicated in ultrapure water and ethanol. Subsequently, the electrode was cleaned by the fresh piranha solution (98% H<sub>2</sub>SO<sub>4</sub> : 30% H<sub>2</sub>O<sub>2</sub>=3 : 1, v/v) for 10 min, and electrochemically polished with 0.5 M H<sub>2</sub>SO<sub>4</sub>. Finally, it was thoroughly washed with ultrapure water and dried with nitrogen for subsequent use.

**Table S1. Oligonucleotides used in this work.**

| Name                          | Sequence (from 5' to 3')                                                                            |
|-------------------------------|-----------------------------------------------------------------------------------------------------|
| miRNA-141                     | UAACACUGUCUGGUAAGAUGG                                                                               |
| probe CP                      | CCATCTTTACCAGACAGTGAGTTT                                                                            |
| probe STP                     | CACCATGGTGCTACCCTCACTGTCT                                                                           |
| Fc-H1                         | HS-(CH <sub>2</sub> ) <sub>6</sub> -TTTAGACAGTGAGGGTAGCACCAT<br>GGTGATAACAGTGTATGGTGCTACCCTCTTT--Fc |
| MB-H2                         | TTAAGCACCATACACTGTTATCACCATGGTGCTACCCT<br>ATAACAGTGTA-- MB                                          |
| single-base mismatch<br>miRNA | UAACACUGUCAGGUAAGAUGG                                                                               |
| double-base mismatch<br>miRNA | UAACACGGUCUGGUACAGAUGG                                                                              |
| noncomplementary<br>miRNA     | UUGUACUACACAAAAGUACUG                                                                               |

**Table S2. Comparison of the proposed biosensor with other reported methods for miRNA detection.**

| Analytical method                        | Target                 | Detection limit  | Linear range                   | Refs.      |
|------------------------------------------|------------------------|------------------|--------------------------------|------------|
| Colorimetry                              | miRNA-141              | 0.3 fM           | 1 fM – 10 pM                   | [1]        |
| Electrochemiluminescence (ECL)           | let-7a                 | 0.8 fM           | 0 – 2 pM                       | [2]        |
| Surface-enhanced Raman scattering (SERS) | miRNA-21               | 0.34 fM          | 1.0 fM – 10.0 nM               | [3]        |
| Bioluminescent                           | let-7a                 | 7.6 fM           | 25 fM – 1 pM                   | [4]        |
| Fluorescence                             | let - 7a               | 22.6 fM          | 5 fM – 10 pM                   | [5]        |
| Electrochemical                          | miRNA-21,<br>miRNA-141 | 0.3 pM,<br>10 pM | 0.5 – 1000 pM,<br>50 – 1000 pM | [6]        |
| Photoelectrochemical fluorescence        | miRNA-141<br>let-7a    | 0.5 fM<br>4.6 fM | 1 fM – 10 pM<br>5-5000 fM      | [7]<br>[8] |
| Electrochemical                          | exo-miRNA              | 65 aM            | 0.1 fM – 1 nM                  | [9]        |
| Photoelectrochemical                     | miRNA-141              | 0.6 fM           | 2 fM -170 pM                   | [10]       |
| Fluorescence                             | let-7a                 | 2.4 pM           | 2.4 pM-150 pM                  | [11]       |
| Electrochemical                          | miRNA-141              | 200 aM           | 1 fM – 100 pM                  | This work  |

**Table S3. Reproducibility of the proposed biosensor.**

| Number | $I_{MB}/I_{Fc}$ of 1 fM miRNA | $I_{MB}/I_{Fc}$ of 1 pM miRNA | $I_{MB}/I_{Fc}$ of 100 pM miRNA |
|--------|-------------------------------|-------------------------------|---------------------------------|
| 1      | 0.77                          | 2.10                          | 3.16                            |
| 2      | 0.72                          | 2.03                          | 3.01                            |
| 3      | 0.74                          | 2.02                          | 2.94                            |

## References

1. H. L. Shao, J. Lu, Q. Q. Zhang, Y. F. Hu, S. Wang and Z. Y. Guo, *Sens. Actuator B*, 2018, **268**, 39–46.
2. W. Y. Nie, Q. Wang, L. Y. Zou, Y. Zheng, X. F. Liu, X. H. Yang and K. M. Wang, *Anal. Chem.*, 2018, **90**, 12584–12591.
3. S. P. Wen, Y. Su, C. X. Dai, J. R. Jia, G. C. Fan, L. P. Jiang, R. B. Song and J. J. Zhu, *Anal. Chem.*, 2019, **91**, 12298–12306.
4. Q. F. Xu, F. Ma, S. Q. Huang, B. Tang and C. Y. Zhang, *Anal. Chem.*, 2017, **89**, 7077–7083.
5. H. Lee, R. L. Srinivas, A. Gupta and P. S. Doyle, *Angew. Chem. Int. Ed.*, 2015, **54**, 2477–2481.
6. S. Azzouzi, Z. Fredj, A. P. F. Turner, M. B. Ali and W. C. Mak, *ACS Sens.*, 2019, **4**, 326–334.
7. N. Zhang, X. M. Shi, H. Q. Guo, X. Z. Zhao, W. W. Zhao, J. J. Xu and H. Y. Chen, *Anal. Chem.*, 2018, **90**, 11892–11898.
8. J. Ge, Y. Hu, R. J. Deng, Z. H. Li, K. X. Zhang, M. L. Shi, D. Yang, R. Cai and W. H. Tan, *Anal. Chem.*, 2020, **92**, 13588–13594.
9. P. Liu, X. Q. Qian, X. M. Li, L. Fan, X. Y. Li, D. X. Cui and Y. R. Yan, *ACS Appl. Mater. Interfaces*, 2020, **12**, 45648–45656.
10. L. Li, Y. Zhang, Z. Yan, M. Q. Chen, L. N. Zhang, P. N. Zhao and J. H. Yu, *ACS Sens.*, 2020, **5**, 1482–1490.
11. J. Y. Chen, T. Jin, J. F. Li, X. Y. Zhang, F. Liu, C. Y. Tan and Y. Tan, *ACS Appl. Bio Mater.*, 2021, **4**, 820–828.
